# Supplementary material
Source: publisher site journal article supplement (https://static.cambridge.org/content/id/urn:cambridge.org:id:article:S1368980020001627/resource/name/S1368980020001627supp001.pdf)
Supplement: Supplementary file 1 [file S1368980020001627supp001.pdf]

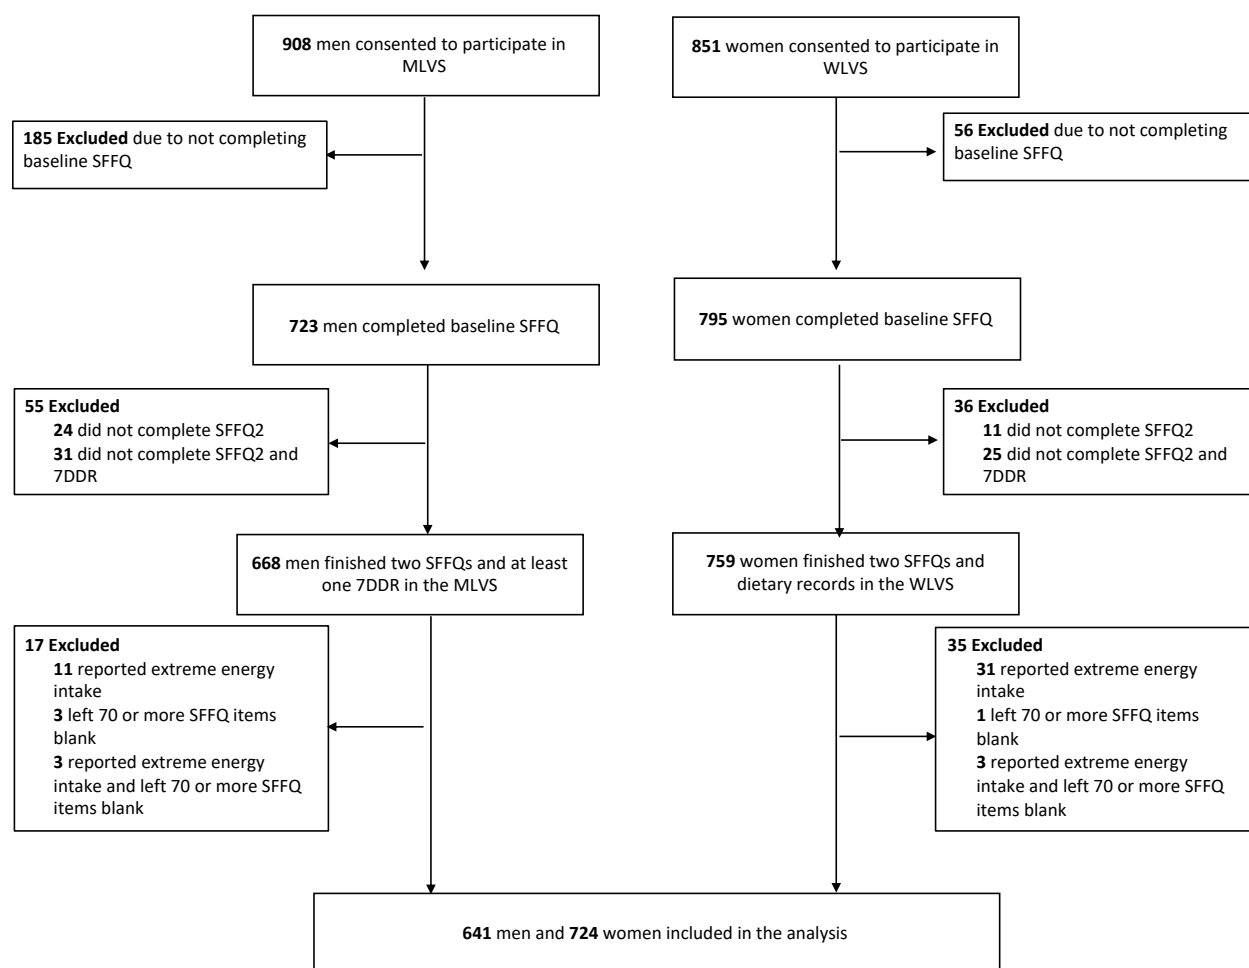

**Supplementary Figure 1.** Participant inclusion and exclusion flowchart

MLVS, Men's Lifestyle Validation Study; SFFQ, semiquantitative food frequency questionnaire; SFFQ2, second semiquantitative food frequency questionnaire; WLVS, Women's Lifestyle Validation Study; 7DDR, weighed 7-day diet records

**Supplementary Table 1.** Spearman rank correlation coefficients comparing semiquantitative food frequency questionnaire-derived flavonoid intake estimates using the Harvard and Phenol-Explorer databases in MLVS and WLVS

|                                | Unadjusted $r_s$ | Energy-adjusted $r_s^*$ |
|--------------------------------|------------------|-------------------------|
| <b>Men</b>                     |                  |                         |
| Total flavonoids               | 0.85             | 0.82                    |
| Flavonols                      | 0.84             | 0.80                    |
| Flavan-3-ol monomers           | 0.77             | 0.73                    |
| Proanthocyanidins <sup>†</sup> | 0.84             | 0.84                    |
| Flavanones                     | 0.73             | 0.70                    |
| Flavones                       | 0.22             | 0.08                    |
| Anthocyanins                   | 0.93             | 0.93                    |
| Isoflavones                    | 0.51             | 0.47                    |
| <b>Women</b>                   |                  |                         |
| Total flavonoids               | 0.85             | 0.82                    |
| Flavonols                      | 0.85             | 0.81                    |
| Flavan-3-ol monomers           | 0.81             | 0.79                    |
| Proanthocyanidins <sup>2</sup> | 0.82             | 0.80                    |
| Flavanones                     | 0.71             | 0.67                    |
| Flavones                       | 0.29             | 0.12                    |
| Anthocyanins                   | 0.96             | 0.93                    |
| Isoflavones                    | 0.48             | 0.43                    |

MLVS, Men's Lifestyle Validation Study;  $r_s$ , Spearman rank correlation coefficient; WLVS, Women's Lifestyle Validation Study

\*Adjusted for total energy intake using the residual method.

<sup>†</sup>Includes proanthocyanidin dimers and trimers.

**Supplementary Table 2.** Rank Intraclass Correlation Coefficients (ICC) comparing flavonoid intake from the first and second week of the 7-Day Dietary Records in MLVS and WLVS

|                                | Unadjusted | Energy-adjusted* |
|--------------------------------|------------|------------------|
| <b>Men</b>                     |            |                  |
| Total flavonoids               | 0.68       | 0.66             |
| Flavonols                      | 0.65       | 0.64             |
| Flavan-3-ol monomers           | 0.60       | 0.60             |
| Proanthocyanidins <sup>†</sup> | 0.51       | 0.51             |
| Flavanones                     | 0.67       | 0.67             |
| Flavones                       | 0.51       | 0.48             |
| Anthocyanins                   | 0.52       | 0.51             |
| Isoflavones                    | 0.42       | 0.39             |
| <b>Women</b>                   |            |                  |
| Total flavonoids               | 0.69       | 0.68             |
| Flavonols                      | 0.63       | 0.62             |
| Flavan-3-ol monomers           | 0.59       | 0.58             |
| Proanthocyanidins <sup>†</sup> | 0.50       | 0.49             |
| Flavanones                     | 0.58       | 0.57             |
| Flavones                       | 0.42       | 0.39             |
| Anthocyanins                   | 0.45       | 0.43             |
| Isoflavones                    | 0.42       | 0.39             |

MLVS, Men's Lifestyle Validation Study;  $r_s$ , Spearman rank correlation coefficient; WLVS, Women's Lifestyle Validation Study

\* Adjusted for total energy intake using the residual method.

<sup>†</sup>Includes proanthocyanidin dimers and trimers.

**Supplementary Table 3.** Mean 7-day diet record intakes from foods assessed and not assessed on the semiquantitative food frequency questionnaire\* in MLVS and WLVS

|                                | 7DDR intake captured by SFFQ foods (mg/d) | 7DDR intake captured by foods not in the SFFQ (mg/d) | % of 7DDR intake captured by SFFQ foods | Major 7DDR food contributors not assessed on SFFQ (percent relative contribution to mean intake) <sup>†</sup> |
|--------------------------------|-------------------------------------------|------------------------------------------------------|-----------------------------------------|---------------------------------------------------------------------------------------------------------------|
| <b>Men</b>                     |                                           |                                                      |                                         |                                                                                                               |
| Total flavonoids               | 332.6                                     | 19.5                                                 | 94                                      | Cherry (2%), blackberry (1%)                                                                                  |
| Flavonols                      | 134.4                                     | 2.7                                                  | 98                                      | --                                                                                                            |
| Flavan-3-ol monomers           | 58.6                                      | 1                                                    | 98                                      | --                                                                                                            |
| Proanthocyanidins <sup>‡</sup> | 43.8                                      | 0.4                                                  | 99                                      | --                                                                                                            |
| Flavanones                     | 41.6                                      | 0.4                                                  | 99                                      | --                                                                                                            |
| Flavones                       | 10.6                                      | 0.7                                                  | 94                                      | Artichoke (4%), oregano (2%)                                                                                  |
| Anthocyanins                   | 43.7                                      | 14.2                                                 | 75                                      | Cherry (13%), blackberry (5%), raspberry (3%), cranberry (2%)                                                 |
| <b>Women</b>                   |                                           |                                                      |                                         |                                                                                                               |
| Total flavonoids               | 310.6                                     | 13.4                                                 | 96                                      | Cherry (2%)                                                                                                   |
| Flavonols                      | 143.6                                     | 2.1                                                  | 99                                      | --                                                                                                            |
| Flavan-3-ol monomers           | 75.1                                      | 0.8                                                  | 99                                      | --                                                                                                            |
| Proanthocyanidins <sup>‡</sup> | 34.2                                      | 0.4                                                  | 99                                      | --                                                                                                            |
| Flavanones                     | 20.6                                      | 0.2                                                  | 99                                      | --                                                                                                            |
| Flavones                       | 7.6                                       | 0.6                                                  | 93                                      | Artichoke (5%), oregano (1%)                                                                                  |
| Anthocyanins                   | 29.6                                      | 9.2                                                  | 76                                      | Cherry (13%), blackberry (6%), raspberry (3%), cranberry (3%)                                                 |

7DDR, weighed 7-day diet records; MLVS, Men's Lifestyle Validation Study; SFFQ, semiquantitative food frequency questionnaire; WLVS, Women's Lifestyle Validation Study

\*Both 7DDR and FFQ flavonoid estimates were derived from Phenol-Explorer; isoflavones were not included because 7DDR intake captured by foods not in the SFFQ was negligible.

<sup>†</sup>Foods are listed if their mean intake is greater than 1% of the 7DDR mean intake

<sup>‡</sup>Includes proanthocyanidin dimers and trimers.

**Supplementary Table 4.** Variance in 7-day diet record intakes from foods assessed and not assessed on the semiquantitative food frequency questionnaire\* in MLVS and WLVS

|                                | Variance in 7DDR intake captured by SFFQ foods (mg/d) <sup>2</sup> | Variance in 7DDR intake captured by foods not in the SFFQ (mg/d) <sup>2</sup> | % of 7DDR variance captured by SFFQ foods | Major 7DDR food contributors not assessed on SFFQ (variance contributed by the food, (mg/d) <sup>2</sup> ) <sup>†</sup> |
|--------------------------------|--------------------------------------------------------------------|-------------------------------------------------------------------------------|-------------------------------------------|-------------------------------------------------------------------------------------------------------------------------|
| <b>Men</b>                     |                                                                    |                                                                               |                                           |                                                                                                                         |
| Total flavonoids               | 56231.7                                                            | 1004.8                                                                        | 98                                        | --                                                                                                                      |
| Flavonols                      | 26594.6                                                            | 11.7                                                                          | 99                                        | --                                                                                                                      |
| Flavan-3-ol monomers           | 7175.0                                                             | 3.2                                                                           | 99                                        | --                                                                                                                      |
| Proanthocyanidins <sup>‡</sup> | 1615.3                                                             | 0.9                                                                           | 99                                        | --                                                                                                                      |
| Flavanones                     | 3083.1                                                             | 3.1                                                                           | 99                                        | --                                                                                                                      |
| Flavones                       | 61.2                                                               | 4.0                                                                           | 94                                        | Artichoke (2.7), oregano (1.2)                                                                                          |
| Anthocyanins                   | 1756.6                                                             | 752.5                                                                         | 70                                        | Cherry (411.2), blackberry (166.9), raspberry (29.1)                                                                    |
| <b>Women</b>                   |                                                                    |                                                                               |                                           |                                                                                                                         |
| <sup>‡</sup> Total flavonoids  | 60739.3                                                            | 388.3                                                                         | 99                                        | --                                                                                                                      |
| Flavonols                      | 29501.6                                                            | 7.6                                                                           | 99                                        | --                                                                                                                      |
| Flavan-3-ol monomers           | 12780.4                                                            | 1.6                                                                           | 99                                        | --                                                                                                                      |
| Proanthocyanidins <sup>‡</sup> | 1422.5                                                             | 0.8                                                                           | 99                                        | --                                                                                                                      |
| Flavanones                     | 1244.7                                                             | 0.5                                                                           | 99                                        | --                                                                                                                      |
| Flavones                       | 23.0                                                               | 3.1                                                                           | 88                                        | Artichoke (2.7)                                                                                                         |
| Anthocyanins                   | 1089.4                                                             | 284.7                                                                         | 79                                        | Cherry (183.3), blackberry (67.5), raspberry (11.5)                                                                     |

7DDR, weighed 7-day diet records; MLVS, Men's Lifestyle Validation Study; SFFQ, semiquantitative food frequency questionnaire; WLVS, Women's Lifestyle Validation Study

\*Both 7DDR and FFQ flavonoid estimates were derived from Phenol-Explorer; isoflavones were not included because 7DDR intake captured by foods not in the SFFQ was negligible.

<sup>†</sup>Foods are listed if their variance in intake is greater than 1% of the 7DDR variance

<sup>‡</sup>Includes proanthocyanidin dimers and trimers.

**Supplementary Table 5.** Intake estimates for major food contributors to flavonoid intake in MLVS and WLVS

|              | Percent of cohort who consumed the food | Final SFFQ               |      |                   |      | Percent of cohort who consumed the food | 7DDR*                    |     |                   |     |
|--------------|-----------------------------------------|--------------------------|------|-------------------|------|-----------------------------------------|--------------------------|-----|-------------------|-----|
|              |                                         | Mean (SD) intake (g/day) |      |                   |      |                                         | Mean (SD) intake (g/day) |     |                   |     |
|              |                                         | Consumers only           |      | Entire population |      |                                         | Consumers only           |     | Entire population |     |
|              | Mean                                    | SD                       | Mean | SD                | Mean | SD                                      | Mean                     | SD  |                   |     |
| <b>Men</b>   |                                         |                          |      |                   |      |                                         |                          |     |                   |     |
| Apple        | 86                                      | 66                       | 70   | 57                | 69   | 84                                      | 52                       | 50  | 44                | 50  |
| Blueberry    | 79                                      | 25                       | 33   | 20                | 31   | 64                                      | 21                       | 25  | 13                | 22  |
| Grapefruit   | 36                                      | 30                       | 47   | 11                | 31   | 36                                      | 33                       | 50  | 12                | 34  |
| Onion        | 90                                      | 30                       | 41   | 27                | 40   | 100                                     | 18                       | 13  | 18                | 13  |
| Orange       | 73                                      | 36                       | 47   | 26                | 43   | 60                                      | 27                       | 34  | 16                | 30  |
| Orange juice | 61                                      | 110                      | 99   | 67                | 94   | 60                                      | 99                       | 97  | 60                | 90  |
| Soy milk     | 10                                      | 174                      | 150  | 16                | 68   | 8                                       | 113                      | 111 | 9                 | 44  |
| Red wine     | 69                                      | 85                       | 98   | 59                | 91   | 62                                      | 92                       | 95  | 58                | 88  |
| Strawberry   | 80                                      | 17                       | 20   | 13                | 19   | 84                                      | 15                       | 25  | 13                | 23  |
| Tea          | 49                                      | 183                      | 262  | 91                | 206  | 59                                      | 241                      | 283 | 141               | 247 |
| Tofu         | 24                                      | 23                       | 36   | 5                 | 20   | 14                                      | 10                       | 16  | 1                 | 7   |
| <b>Women</b> |                                         |                          |      |                   |      |                                         |                          |     |                   |     |
| Apple        | 92                                      | 60                       | 57   | 55                | 57   | 85                                      | 39                       | 35  | 33                | 35  |
| Blueberry    | 77                                      | 19                       | 22   | 15                | 21   | 52                                      | 16                       | 20  | 8                 | 17  |
| Grapefruit   | 32                                      | 20                       | 31   | 6                 | 20   | 40                                      | 20                       | 25  | 8                 | 19  |
| Onion        | 91                                      | 33                       | 34   | 30                | 34   | 100                                     | 13                       | 8   | 13                | 8   |
| Orange       | 69                                      | 25                       | 26   | 17                | 24   | 64                                      | 22                       | 24  | 14                | 22  |
| Orange juice | 49                                      | 80                       | 99   | 39                | 80   | 55                                      | 57                       | 69  | 31                | 59  |
| Soy milk     | 13                                      | 121                      | 110  | 15                | 56   | 10                                      | 93                       | 74  | 10                | 37  |
| Red wine     | 53                                      | 58                       | 83   | 30                | 67   | 48                                      | 58                       | 75  | 28                | 59  |
| Strawberry   | 90                                      | 16                       | 17   | 14                | 17   | 88                                      | 14                       | 18  | 12                | 18  |
| Tea          | 67                                      | 207                      | 288  | 139               | 255  | 77                                      | 269                      | 299 | 208               | 286 |
| Tofu         | 20                                      | 17                       | 25   | 3                 | 13   | 7                                       | 10                       | 17  | 1                 | 5   |

7DDR, weighed 7-day diet record; MLVS, Men's Lifestyle Validation Study; SD, standard deviation; SFFQ, semiquantitative food frequency questionnaire; WLVS, Women's Lifestyle Validation Study

\*Values represent the average of two weeks of weighed dietary records

**Supplementary Table 6.** Rank Intraclass Correlation Coefficients of major food contributors to flavonoid intake using the 7-Day Dietary Records in MLVS and WLVS

|              | ICC* |
|--------------|------|
| Men          |      |
| Apple        | 0.49 |
| Blueberry    | 0.55 |
| Grapefruit   | 0.44 |
| Onion        | 0.40 |
| Orange       | 0.30 |
| Orange juice | 0.77 |
| Soymilk      | 0.62 |
| Red wine     | 0.75 |
| Strawberry   | 0.31 |
| Tea          | 0.80 |
| Tofu         | 0.42 |
| Women        |      |
| Apple        | 0.40 |
| Blueberry    | 0.54 |
| Grapefruit   | 0.22 |
| Onion        | 0.33 |
| Orange       | 0.11 |
| Orange juice | 0.75 |
| Soymilk      | 0.77 |
| Red wine     | 0.79 |
| Strawberry   | 0.22 |
| Tea          | 0.75 |
| Tofu         | 0.27 |

MLVS, Men's Lifestyle Validation Study;  $r_s$ , Spearman rank correlation coefficient; WLVS, Women's Lifestyle Validation Study  
 \*Values represent the ICC comparing the first and second week of 7-Day Dietary Records

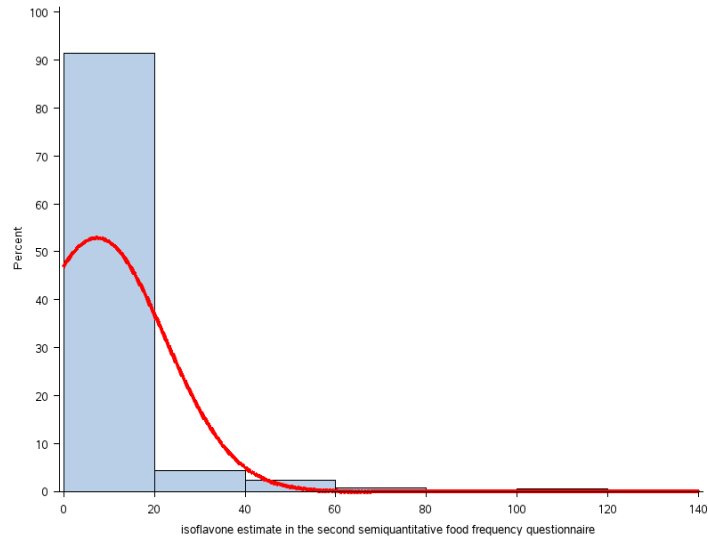

(a) MLVS

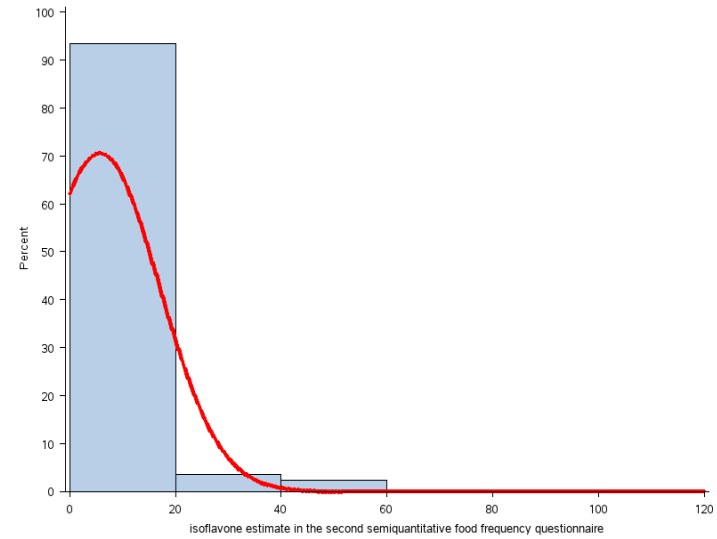

(b) WLVS

**Supplementary Figure 2.** Isoflavone distribution in the second semiquantitative food frequency questionnaire for (a) MLVS (b) WLVS

MLVS, Men's Lifestyle Validation Study; WLVS, Women's Lifestyle
